# Supplementary material for: Membranes for Cation Transport Based on Dendronized Poly(epichlorohydrin-co-ethylene oxide). Part 1: The Effect of Dendron Amount and Column Orientation on Copolymer Mobility
Source: MDPI journal article supplement (doi:10.3390/polym13203532), 2021-10-14
Supplement: s1 [file s1]

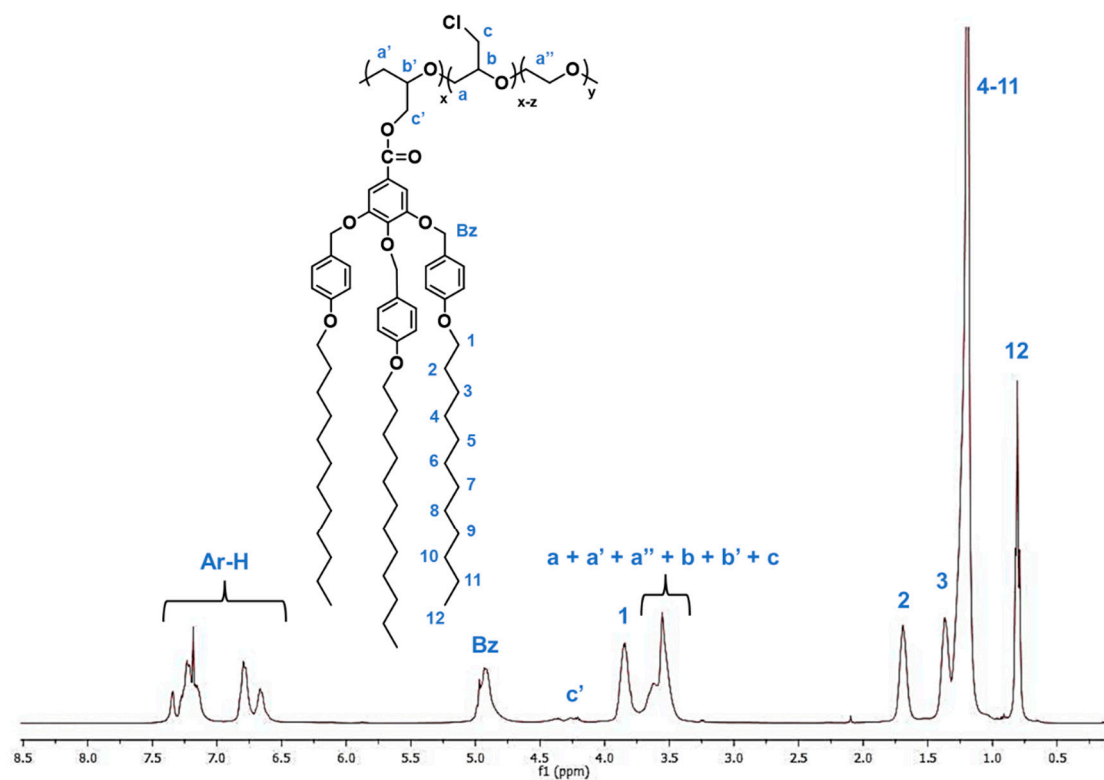

**Figure S1.**  $^1\text{H}$  NMR spectrum in  $\text{CDCl}_3$  of CP40 at room temperature.

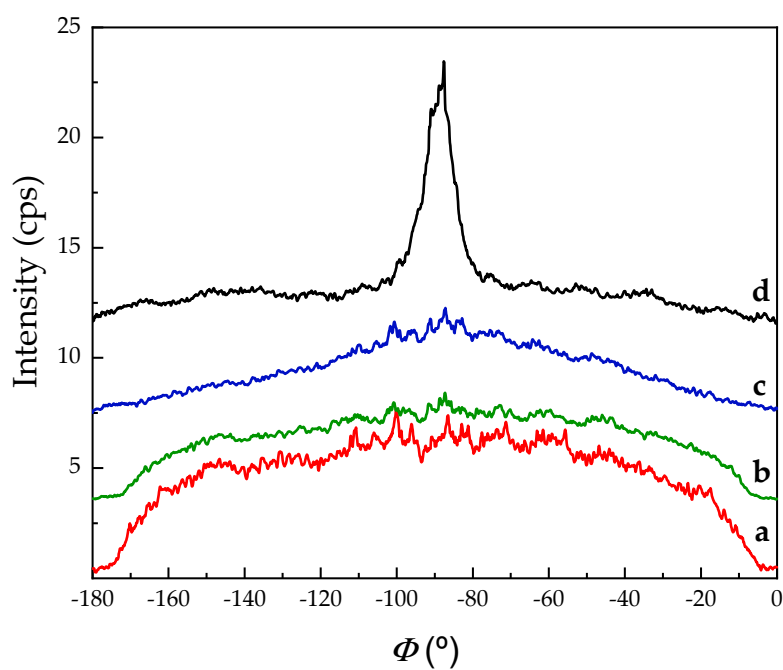

**Figure S2.**  $\Phi$  diffractograms from azimuthal scan on the reflection at  $2\theta = 2.2^\circ$  of CP40 (samples (a) – (d)) after the thermal treatment with different conditions.
